# Supplementary material for: Research Progress of Natural Active Substances with Immunosuppressive Activity
Source: MDPI journal article supplement (doi:10.3390/molecules29102359), 2024-05-16
Supplement: s1 [file s1]

Supplementary Materials for

## **Research Progress of Natural Active Substances with Immunosuppressive Activity**

Fei Shao <sup>1</sup>, Qiying Shen <sup>1</sup>, Zhengfei Yang <sup>3</sup>, Wenqian Yang <sup>1</sup>, Zixiang Lu <sup>1</sup>, Jie Zheng <sup>1</sup>,

Liming Zhang <sup>1,\*</sup> and Hangying Li <sup>1,2,\*</sup>

<sup>1</sup> School of Pharmacy, Ningxia Medical University, Yinchuan 750004, China

<sup>2</sup> Key Laboratory of Craniocerebral Diseases of Ningxia Medical University, Yinchuan 750004, China

<sup>3</sup> School of Traditional Chinese Medicine, Ningxia Medical University, Yinchuan 750004, China

\* Correspondence: nyzlm@163.com (L.Z.); lihy17@lzu.edu.cn (H.L.)

## List of Supplementary Materials

|                                                                               |    |
|-------------------------------------------------------------------------------|----|
| <b>Table S1.</b> Compounds <b>1–36</b> with Immunosuppressive Effects.....    | 3  |
| <b>Table S2.</b> Compounds <b>37–115</b> with Immunosuppressive Effects.....  | 6  |
| <b>Table S3.</b> Compounds <b>116–136</b> with Immunosuppressive Effects..... | 10 |
| <b>Table S4.</b> Compounds <b>137–149</b> with Immunosuppressive Effects..... | 12 |
| <b>Table S5.</b> Compounds <b>150–176</b> with Immunosuppressive Effects..... | 13 |
| <b>Table S6.</b> Compounds <b>177–234</b> with Immunosuppressive Effects..... | 15 |
| <b>Table S7.</b> Compounds <b>235–262</b> with Immunosuppressive Effects..... | 19 |
| <b>Table S8.</b> Compounds <b>263–270</b> with Immunosuppressive Effects..... | 22 |
| <b>Table S9.</b> Compounds <b>271–324</b> with Immunosuppressive Effects..... | 23 |

**Table S1.** Compounds 1–36 with Immunosuppressive Effects.

| Number | Compounds                                                                                                                                                         | Type  | Source                 | Model 1                                 | Activities<br>IC <sub>50</sub> | Model 2                           | Activities<br>IC <sub>50</sub> | Reference |
|--------|-------------------------------------------------------------------------------------------------------------------------------------------------------------------|-------|------------------------|-----------------------------------------|--------------------------------|-----------------------------------|--------------------------------|-----------|
| 1      | Argyrolide G                                                                                                                                                      | Plant | <i>Artemisia argyi</i> | LPS stimulated in BV-2 microglial cells | 5.3 $\mu$ M                    | /                                 | /                              | [28]      |
| 2      | 8 $\alpha$ -acetoxy-3 $\beta$ -chloro-1 $\alpha$ ,4 $\alpha$ -dihydroxyguai-9,11(13)-dien-6 $\alpha$ ,12-olide                                                    |       |                        |                                         | 3.2 $\mu$ M                    |                                   | /                              |           |
| 3      | 8 $\alpha$ -acetoxy-3 $\alpha$ -chloro-1 $\alpha$ ,4 $\beta$ -dihydroxyguai-9,11(13)-dien-6 $\alpha$ ,12-olide                                                    |       |                        |                                         | 6.9 $\mu$ M                    |                                   | /                              |           |
| 4      | 8 $\alpha$ -acetoxy-3 $\beta$ -chloro-1 $\alpha$ ,4 $\alpha$ -dihydroxyguai-10(14),11(13)-dien-6 $\alpha$ ,12-olide                                               |       |                        |                                         | 4.2 $\mu$ M                    |                                   | /                              |           |
| 5      | 8 $\alpha$ -acetoxy-3 $\alpha$ -chloro-1 $\beta$ ,2 $\beta$ -epoxy-4 $\beta$ ,10 $\alpha$ -dihydroxy-5 $\alpha$ ,7 $\alpha$ H-guai-11(13)-en-12,6 $\alpha$ -olide |       |                        |                                         | 22.2 $\mu$ M                   |                                   | /                              |           |
| 6      | 3 $\beta$ -chloro-1 $\alpha$ ,2 $\alpha$ -epoxy-4 $\alpha$ ,10 $\alpha$ -dihydroxy-5 $\alpha$ ,7 $\alpha$ H-guai-11(13)-en-12,6 $\alpha$ -olide                   |       |                        |                                         | 6.4 $\mu$ M                    |                                   | /                              |           |
| 7      | Tremutin A                                                                                                                                                        | Fungi | <i>Irpex lacteus</i>   | ConA-induced T-cell proliferation       | /                              | LPS-induced B-cells proliferation | 22.4 $\mu$ M                   | [29]      |
| 8      | Tremutin B                                                                                                                                                        |       |                        |                                         | 16.7 $\mu$ M                   |                                   | 13.6 $\mu$ M                   |           |

|    |                               |       |                                             |                                               |              |                                      |              |      |
|----|-------------------------------|-------|---------------------------------------------|-----------------------------------------------|--------------|--------------------------------------|--------------|------|
| 9  | Canin                         | Plant | <i>A. argyi</i>                             | anti-CD3/anti-CD28<br>stimulated spleen cells | 2.7 $\mu$ M  | /                                    | /            | [28] |
| 10 | <i>seco</i> -tanapartholide B |       |                                             |                                               | 1.0 $\mu$ M  | /                                    | /            |      |
| 11 | <i>seco</i> -tanapartholide A |       |                                             |                                               | 1.2 $\mu$ M  | /                                    | /            |      |
| 12 | Arteglinin A                  |       |                                             |                                               | 1.9 $\mu$ M  | /                                    | /            |      |
| 13 | 8-acetylartemisininolide      |       |                                             |                                               | 3.2 $\mu$ M  | /                                    | /            |      |
| 14 | Maydispenoid A                | Fungi | <i>Bipolaris<br/>maydis</i>                 | anti-CD3/anti-CD28<br>stimulated spleen cells | 5.28 $\mu$ M | /                                    | /            | [30] |
| 15 | Maydispenoid B                |       |                                             |                                               | 9.38 $\mu$ M |                                      | /            |      |
| 16 | Antroxazole A                 | Fungi | <i>Antrodiaella<br/>albocinnamo<br/>mea</i> | /                                             | /            | LPS-induced B-cells<br>proliferation | 16.3 $\mu$ M | [14] |
| 17 | (+)-aspersydowin A            | Fungi | <i>Aspergillus<br/>sydowii</i>              | anti-CD3/anti-CD28<br>stimulated spleen cells | >40 $\mu$ M  | LPS-induced B-cells<br>proliferation | 10.9 $\mu$ M | [31] |
| 18 | (+)-aspersydowin B            |       |                                             |                                               | >40 $\mu$ M  |                                      | 17.6 $\mu$ M |      |
| 19 | (7S)-(+)-7-O-methylsydono     |       |                                             |                                               | >40 $\mu$ M  |                                      | 13.4 $\mu$ M |      |
| 20 | Parasubolide D                | Plant | <i>Parasenecio<br/>albus</i>                | LPS-induced spleen-cell<br>proliferation      | 23.1 $\mu$ M | /                                    | /            | [32] |
| 21 | Parasubolide E                |       |                                             |                                               | 33.8 $\mu$ M | /                                    | /            |      |
| 22 | Parasubolide L                |       |                                             |                                               | 26.6 $\mu$ M | /                                    | /            |      |
| 23 | Steccherin A                  | Fungi | <i>Steccherinum<br/>ochraceum</i>           | ConA-induced T-cell<br>proliferation          | >40 $\mu$ M  | LPS-induced B-cells<br>proliferation | 26.3 $\mu$ M | [33] |
| 24 | Steccherin B                  |       |                                             |                                               | >40 $\mu$ M  |                                      | >40 $\mu$ M  |      |
| 25 | Steccherin C                  |       |                                             |                                               | 37.8 $\mu$ M |                                      | 6.2 $\mu$ M  |      |
| 26 | Steccherin D                  |       |                                             |                                               | >40 $\mu$ M  |                                      | 16.1 $\mu$ M |      |
| 27 | Soltorvum A                   | Plant | <i>Solanum<br/>torvum.</i>                  | ConA-induced T-cell<br>proliferation          | 27.0 $\mu$ M | /                                    | /            | [34] |
| 28 | Soltorvum B                   |       |                                             |                                               | 18.0 $\mu$ M | /                                    | /            |      |

|    |                  |       |                                 |                                      |              |                                      |               |      |
|----|------------------|-------|---------------------------------|--------------------------------------|--------------|--------------------------------------|---------------|------|
| 29 | Craterodoratin C | Fungi | <i>Craterellus<br/>odoratus</i> | ConA-induced T-cell<br>proliferation | /            | LPS-induced B-cells<br>proliferation | 12.62 $\mu$ M | [35] |
| 30 | Craterodoratin J |       |                                 |                                      | /            |                                      | 19.4 $\mu$ M  |      |
| 31 | Craterodoratin L |       |                                 |                                      | /            |                                      | 13.7 $\mu$ M  |      |
| 32 | Craterodoratin M |       |                                 |                                      | /            |                                      | 15.4 $\mu$ M  |      |
| 33 | Craterodoratin N |       |                                 |                                      | /            |                                      | 13.2 $\mu$ M  |      |
| 34 | Craterodoratin O |       |                                 |                                      | /            |                                      | 17.1 $\mu$ M  |      |
| 35 | Craterodoratin Q |       |                                 |                                      | 31.5 $\mu$ M |                                      | /             |      |
| 36 | Craterodoratin S |       |                                 |                                      | /            |                                      | 22.6 $\mu$ M  |      |

**Table S2.** Compounds 37–115 with Immunosuppressive Effects.

| Number | Compounds                                                                             | Type  | Source                                                      | Model 1                               | Activities<br>IC <sub>50</sub> | Model 2                                 | Activities<br>IC <sub>50</sub> | Reference |
|--------|---------------------------------------------------------------------------------------|-------|-------------------------------------------------------------|---------------------------------------|--------------------------------|-----------------------------------------|--------------------------------|-----------|
| 37     | Ineleganolide                                                                         | Coral | <i>Sinularia scabra</i> and<br><i>Sinularia polydactyla</i> | ConA-induced                          | >50 $\mu$ M                    | LPS-induced                             | >50 $\mu$ M                    | [36]      |
| 38     | Yonarolide                                                                            |       |                                                             | T-cell proliferation                  | >50 $\mu$ M                    | B-cells                                 | >50 $\mu$ M                    |           |
| 39     | Scabrolide A                                                                          |       |                                                             |                                       | >50 $\mu$ M                    | proliferation                           | >50 $\mu$ M                    |           |
| 40     | Cinnacassioid G                                                                       | Plant | <i>Cinnamomum cassia</i>                                    | ConA-induced                          | /                              | /                                       | /                              | [37]      |
| 41     | Cinnacasol                                                                            |       |                                                             | T-cell proliferation                  | /                              | /                                       | /                              |           |
| 42     | 3,5,10-O<br>triacetyl-8- <i>O</i> -isobutanoyl-14- <i>O</i> -benzoylcyclomy<br>rsinol | Plant | <i>Euphorbia</i><br><i>kopetdaghi</i> Prokh                 | PHA-activated<br>T-Cell proliferation | 1.83 mg /mL                    | /                                       | /                              | [38]      |
| 43     | Xylarilongipin A                                                                      | Fungi | <i>Xylaria longipes</i><br>HFG1018                          | ConA-induced<br>T-cell proliferation  | 22.4 $\mu$ M                   | LPS-induced<br>B-cells<br>proliferation | 22.4 $\mu$ M                   | [39]      |
| 44     | Triptetifordin                                                                        | Plant | <i>Ligularia fischeri</i>                                   | human B                               | 56.3 $\mu$ M                   | /                                       | /                              | [40]      |
| 45     | 16 $\alpha$ ,17-dihydroxy-ent-kaur-20-al.                                             |       |                                                             | lymphoblast                           | 13.3 $\mu$ M                   | /                                       | /                              |           |
| 46     | ent-2 $\beta$ -hydroxymanool                                                          |       |                                                             | HMy2.CIR cells                        | 31.4 $\mu$ M                   | /                                       | /                              |           |
| 47     | Koilodenoid D                                                                         | Plant | <i>Koilodepas</i><br><i>hainanense</i>                      | ConA-induced<br>T-cell proliferation  | 23.8 $\mu$ M                   | LPS-induced<br>B-cells<br>proliferation | 10.2 $\mu$ M                   | [41]      |
| 48     | Koilodenoid G                                                                         |       |                                                             |                                       | 3.1 $\mu$ M                    |                                         | 2.2 $\mu$ M                    |           |
| 49     | ent-5 $\alpha$ ,2,15-dioxodolabr-3-ene-3,16-diol                                      |       |                                                             |                                       | 0.8 $\mu$ M                    |                                         | 0.3 $\mu$ M                    |           |
| 50     | ent-5 $\alpha$ ,3,15-dioxodolabr-1,4(18)-diene-2,16-diol                              |       |                                                             |                                       | 30.5 $\mu$ M                   |                                         | 4.7 $\mu$ M                    |           |
| 51     | ent-16-nor-5 $\alpha$ ,13 $\alpha$ (methyl)-2-oxodolabra-3-en-3<br>-ol-15-oicacid     |       |                                                             |                                       | 3.4 $\mu$ M                    |                                         | 3.1 $\mu$ M                    |           |

|    |                                                          |       |                                                                                     |                                      |               |                                         |               |      |
|----|----------------------------------------------------------|-------|-------------------------------------------------------------------------------------|--------------------------------------|---------------|-----------------------------------------|---------------|------|
| 52 | Xylarinorditerpene B                                     | Fungi | <i>Xylaria longipes</i><br>HFG1018                                                  | ConA-induced<br>T-cell proliferation | 11.1 $\mu$ M  | LPS-induced<br>B-cells<br>proliferation | 35.1 $\mu$ M  | [42] |
| 53 | Xylarinorditerpene C                                     |       |                                                                                     |                                      | 6.6 $\mu$ M   |                                         | 38.2 $\mu$ M  |      |
| 54 | Xylarinorditerpene D                                     |       |                                                                                     |                                      | 21.1 $\mu$ M  |                                         | 51.8 $\mu$ M  |      |
| 55 | Xylarinorditerpene E                                     |       |                                                                                     |                                      | 14.9 $\mu$ M  |                                         | 49.4 $\mu$ M  |      |
| 56 | Xylarinorditerpene I                                     |       |                                                                                     |                                      | 1.0 $\mu$ M   |                                         | 16.1 $\mu$ M  |      |
| 57 | Xylarinorditerpene N                                     |       |                                                                                     |                                      | 4.0 $\mu$ M   |                                         | 46 $\mu$ M    |      |
| 58 | 14 $\alpha$ ,16-epoxy-18-norisopimar-7-en-4 $\alpha$ -ol |       |                                                                                     |                                      | 27.2 $\mu$ M  |                                         | 40 $\mu$ M    |      |
| 59 | Agatadiol                                                |       |                                                                                     |                                      | 15.6 $\mu$ M  |                                         | 47.2 $\mu$ M  |      |
| 60 | Robustaditerpenes C                                      | Fungi | <i>Ilyonectria robusta</i>                                                          | ConA-induced                         | /             | LPS-induced                             | 17.42 $\mu$ M | [43] |
| 61 | Robustaditerpenes E                                      |       |                                                                                     | T-cell proliferation                 | 75.22 $\mu$ M | B-cells<br>proliferation                | /             |      |
| 62 | Scopariusicid I                                          | Plant | <i>Isodon scoparius</i>                                                             | ConA-induced                         | 10.1 $\mu$ M  | /                                       | /             | [44] |
| 63 | Scopariusicid J                                          |       |                                                                                     | T-cell proliferation                 | 9.4 $\mu$ M   | /                                       | /             |      |
| 64 | Scopariusicid L                                          |       |                                                                                     |                                      | 16.3 $\mu$ M  | /                                       | /             |      |
| 65 | Scopariusic Acid                                         | Plant | <i>Isodon scoparius</i>                                                             | ConA-induced<br>T-cell proliferation | 2.6 $\mu$ M   | /                                       | /             | [46] |
| 66 | Ceforloid F                                              | Plant | <i>Cephalotaxus fortunei</i><br>var. <i>alpina</i> and <i>C.</i><br><i>sinensis</i> | ConA-induced<br>T-cell proliferation | 1.93 $\mu$ M  | /                                       | /             | [45] |
| 67 | Xiguscabrolide H                                         | Coral | <i>S. scabra</i> and <i>S.</i><br><i>polydactyla</i>                                | ConA-induced<br>T-cell proliferation | 45.7 $\mu$ M  | LPS-induced<br>B-cells<br>proliferation | 44.1 $\mu$ M  | [36] |
| 68 | 10-epi-gyrosanolide E                                    |       |                                                                                     |                                      | >50 $\mu$ M   |                                         | >50 $\mu$ M   |      |
| 69 | 5-Epi-sinuleptolide                                      |       |                                                                                     |                                      | 39.6 $\mu$ M  |                                         | >50 $\mu$ M   |      |
| 70 | Norcembrene 5                                            |       |                                                                                     |                                      | >50 $\mu$ M   |                                         | >50 $\mu$ M   |      |
| 71 | Scabrolide D                                             |       |                                                                                     |                                      | >50 $\mu$ M   |                                         | >50 $\mu$ M   |      |

|    |                                                                                                      |       |                                         |                                      |              |                                         |              |      |
|----|------------------------------------------------------------------------------------------------------|-------|-----------------------------------------|--------------------------------------|--------------|-----------------------------------------|--------------|------|
| 72 | Scabrolide G                                                                                         | Coral | <i>scabra</i> and <i>S. polydactyla</i> | ConA-induced<br>T-cell proliferation | 23.7 $\mu$ M | LPS-induced<br>B-cells<br>proliferation | 20.5 $\mu$ M | [36] |
| 73 | Sinularcasbane O                                                                                     |       |                                         |                                      | >50 $\mu$ M  |                                         | >50 $\mu$ M  |      |
| 74 | Gyrosanolide F                                                                                       |       |                                         |                                      | 29.1 $\mu$ M |                                         | >100 $\mu$ M |      |
| 75 | Sinuleptolide                                                                                        |       |                                         |                                      | 8.5 $\mu$ M  |                                         | 21.7 $\mu$ M |      |
| 76 | Xiguscabrate A                                                                                       | Plant | <i>S. scabra</i>                        | ConA-induced<br>T-cell proliferation | >50 $\mu$ M  | LPS-induced<br>B-cell<br>proliferation  | 46.5 $\mu$ M | [47] |
| 77 | Xiguscabrate B                                                                                       |       |                                         |                                      | 8.4 $\mu$ M  |                                         | 25.6 $\mu$ M |      |
| 78 | Xiguscabral A                                                                                        |       |                                         |                                      | 15.8 $\mu$ M |                                         | 44 $\mu$ M   |      |
| 79 | Xiguscabrol A                                                                                        |       |                                         |                                      | 5.5 $\mu$ M  |                                         | >50 $\mu$ M  |      |
| 80 | Xiguscabrol B                                                                                        |       |                                         |                                      | 3.9 $\mu$ M  |                                         | 44.8 $\mu$ M |      |
| 81 | 8- <i>epi</i> -xiguscabrol B                                                                         |       |                                         |                                      | 2.3 $\mu$ M  |                                         | 34.9 $\mu$ M |      |
| 82 | (1 <i>Z</i> ,5 <i>E</i> ,7 <i>E</i> ,11 <i>E</i> )-8-isopropyl-5,11-dimethylcyclo<br>tetradeca-      |       |                                         |                                      | >50 $\mu$ M  |                                         | >50 $\mu$ M  |      |
| 83 | 11 <i>S</i> ,12 <i>S</i> -epoxy-11,12-dihydrocembrene-C                                              |       |                                         |                                      | 39.2 $\mu$ M |                                         | 14 $\mu$ M   |      |
| 84 | Sinulariol C                                                                                         |       |                                         |                                      | 4.5 $\mu$ M  |                                         | 46.8 $\mu$ M |      |
| 85 | Cembrene-A                                                                                           |       |                                         |                                      | 44.3 $\mu$ M |                                         | 16.7 $\mu$ M |      |
| 86 | Pentaene-cembrene                                                                                    |       |                                         |                                      | >50 $\mu$ M  |                                         | 39.3 $\mu$ M |      |
| 87 | (1 <i>S</i> )-isoscarcophytol-A                                                                      |       |                                         |                                      | 27.1 $\mu$ M |                                         | 44.1 $\mu$ M |      |
| 88 | (1 <i>E</i> ,3 <i>E</i> ,7 <i>E</i> ,11 <i>E</i> )-( 14 <i>R</i> )-cembra-1,3,7,11-tetraen-<br>14-ol |       |                                         |                                      | 19.6 $\mu$ M |                                         | >50 $\mu$ M  |      |
| 89 | (1 <i>S</i> ,2 <i>E</i> , 4 <i>S</i> ,7 <i>E</i> ,11 <i>E</i> ) -2,7,11-cembratriene-4-ol            |       |                                         |                                      | >50 $\mu$ M  |                                         | 49.8 $\mu$ M |      |
| 90 | Nephthenol                                                                                           |       |                                         |                                      | 10.7 $\mu$ M |                                         | 38.6 $\mu$ M |      |
| 91 | (3 <i>E</i> ,11 <i>E</i> )-cembra-3,8(19),11,15-tetraene-7-ol                                        |       |                                         |                                      | 48.9 $\mu$ M |                                         | 42.5 $\mu$ M |      |
| 92 | Sarcophytol T                                                                                        |       |                                         |                                      | 40.4 $\mu$ M |                                         | 32.1 $\mu$ M |      |
| 93 | Gibberosene B                                                                                        |       |                                         |                                      | 33.5 $\mu$ M |                                         | >50 $\mu$ M  |      |



|     |                                                                                                                           |       |                                                          |                                      |              |                                        |              |      |
|-----|---------------------------------------------------------------------------------------------------------------------------|-------|----------------------------------------------------------|--------------------------------------|--------------|----------------------------------------|--------------|------|
| 94  | (1 <i>E</i> ,3 <i>E</i> ,7 <i>E</i> ,11 <i>R</i> *12 <i>R</i> *)-15-(acetoxymethyl)cembra-11,12-epoxy-1,3,7-triene        | Plant | <i>S. Scabra</i>                                         | ConA-induced<br>T-cell proliferation | >50 $\mu$ M  | LPS-induced<br>B-cell<br>proliferation | 10.3 $\mu$ M | [47] |
| 95  | (1 <i>R</i> ,3 <i>S</i> ,4 <i>S</i> ,7 <i>E</i> ,11 <i>E</i> )-3,4-epoxycembra-7,11,15-triene                             |       |                                                          |                                      | >50 $\mu$ M  |                                        | >50 $\mu$ M  |      |
| 96  | Lobocrassin C                                                                                                             |       |                                                          |                                      | 23.1 $\mu$ M |                                        | >50 $\mu$ M  |      |
| 97  | Pseudoplexauric acid methyl ester                                                                                         |       |                                                          |                                      | >50 $\mu$ M  |                                        | >50 $\mu$ M  |      |
| 98  | (1 <i>E</i> ,3 <i>E</i> ,7 <i>R</i> ,8 <i>R</i> ,11 <i>E</i> ,14 <i>R</i> )-3,4-epoxy-14-acetatecembra-1,3,11-trien-14-ol |       |                                                          |                                      | 11.9 $\mu$ M |                                        | 40.1 $\mu$ M |      |
| 99  | (2 <i>R</i> ,11 <i>S</i> ,12 <i>S</i> )-isosarcophytoxide                                                                 |       |                                                          |                                      | >50 $\mu$ M  |                                        | 4.4 $\mu$ M  |      |
| 100 | Sarcophytoxide                                                                                                            |       |                                                          |                                      | >50 $\mu$ M  |                                        | >50 $\mu$ M  |      |
| 101 | Isosarcophine                                                                                                             |       |                                                          |                                      | 47.8 $\mu$ M |                                        | >50 $\mu$ M  |      |
| 102 | (+)-marasol                                                                                                               |       |                                                          |                                      | 27.4 $\mu$ M |                                        | >50 $\mu$ M  |      |
| 103 | Sarcophytol W                                                                                                             |       |                                                          |                                      | >50 $\mu$ M  |                                        | >50 $\mu$ M  |      |
| 104 | Sinulariol Z                                                                                                              |       |                                                          |                                      | >50 $\mu$ M  |                                        | >50 $\mu$ M  |      |
| 105 | Sinulariol Z                                                                                                              |       |                                                          |                                      | 6.1 $\mu$ M  |                                        | 52.9 $\mu$ M |      |
| 106 | Sinuflexibilin D                                                                                                          |       |                                                          |                                      | 39.4 $\mu$ M |                                        | 34.5 $\mu$ M |      |
| 107 | Sinulariolide                                                                                                             |       |                                                          |                                      | 19.5 $\mu$ M |                                        | 9.2 $\mu$ M  |      |
| 108 | Sinuladiterpene G                                                                                                         |       |                                                          |                                      | >50 $\mu$ M  |                                        | >50 $\mu$ M  |      |
| 109 | Sarcomililate 1a                                                                                                          | Coral | the Hainan Soft Coral<br><i>Sarcophyton mililatensis</i> | ConA-induced<br>T-cell proliferation | 49.8 $\mu$ M | LPS-induced<br>B-cell<br>proliferation | 20.2 $\mu$ M | [48] |
| 110 | Sarcomililate 1b                                                                                                          |       |                                                          |                                      | 38.9 $\mu$ M |                                        | 22.1 $\mu$ M |      |
| 111 | Sarcomililatol B                                                                                                          |       |                                                          |                                      | >50 $\mu$ M  |                                        | >50 $\mu$ M  |      |
| 112 | Sarcomililatols 2a                                                                                                        |       |                                                          |                                      | 44.5 $\mu$ M |                                        | 18.7 $\mu$ M |      |
| 113 | Sarcomililatols 3a                                                                                                        |       |                                                          |                                      | >50 $\mu$ M  |                                        | 49.5 $\mu$ M |      |
| 114 | Yalongene A                                                                                                               |       |                                                          |                                      | >50 $\mu$ M  |                                        | 4.8 $\mu$ M  |      |
| 115 | Sarcophytol M                                                                                                             |       |                                                          |                                      | 11.4 $\mu$ M |                                        | 4.9 $\mu$ M  |      |

**Table S3.** Compounds 116–136 with Immunosuppressive Effects.

| Noumber | Compounds                                                       | Type  | Source                         | Model 1                                    | Activities<br>IC <sub>50</sub> | Model 2                          | Activities<br>IC <sub>50</sub> | Reference |
|---------|-----------------------------------------------------------------|-------|--------------------------------|--------------------------------------------|--------------------------------|----------------------------------|--------------------------------|-----------|
| 116     | Munronoid P                                                     | Plant | <i>Munronia pinnata</i>        | ConA-induced T-cell proliferation          | 2.73 $\mu$ M                   | LPS-induced B-cell proliferation | 34.88 $\mu$ M                  | [49]      |
| 117     | Triterhyper A                                                   | Plant | <i>Hypericum longistylum</i>   | anti-CD3/anti-CD28 stimulated spleen cells | 4.5 $\mu$ M                    | /                                | /                              | [50]      |
| 118     | Lupeol                                                          |       |                                |                                            | 18.3 $\mu$ M                   |                                  | /                              |           |
| 119     | 3b-hydroxyoleane-6b-oxethyl-12-en-28-oicacid-3-O-b-D-glucuronic | Plant | <i>Epigynum griffithianum</i>  | proliferation of mice splenocyte           | 2.5 $\mu$ M                    | /                                | /                              | [14]      |
| 120     | Schincarin C                                                    | Plant | <i>Schisandra</i>              | LPS-induced B-cell proliferation           | 10.2 $\mu$ M                   | /                                | /                              | [51]      |
| 121     | BC-1                                                            | Plant | <i>Beesia calthaefolia</i>     | anti-CD3/anti-CD28 stimulated spleen cells | 9.5 $\mu$ M                    | /                                | /                              | [52]      |
| 122     | Dictabretol A                                                   | Plant | <i>Dictamnus dasycarpus</i>    | ConA-induced T-cell proliferation          | 1.5 $\mu$ M                    | /                                | /                              | [53]      |
| 123     | Dictabretol B                                                   |       |                                |                                            | >20 $\mu$ M                    |                                  | /                              |           |
| 124     | Dictabretol C                                                   |       |                                |                                            | 1.8 $\mu$ M                    |                                  | /                              |           |
| 125     | Dictabretol D                                                   |       |                                |                                            | 1.5 $\mu$ M                    |                                  | /                              |           |
| 126     | Schincalactones A                                               | Plant | <i>Schisandra</i>              | LPS-induced B-cell proliferation           | 36.8 $\mu$ M                   | /                                | /                              | [54]      |
| 127     | Phainanolide A                                                  | Plant | <i>Phyllanthus hainanensis</i> | ConA-induced T-cell proliferation          | 364.75 $\mu$ M                 | LPS-induced B-cell proliferation | 245.47 $\mu$ M                 | [55]      |
| 128     | Phainanoid G                                                    |       |                                |                                            | 566.83 $\mu$ M                 |                                  | 456.63 $\mu$ M                 |           |
| 129     | Phainanoid H                                                    |       |                                |                                            | 16.15 $\mu$ M                  |                                  | 8.24 $\mu$ M                   |           |
| 130     | Phainanoid I                                                    |       |                                |                                            | 218.14 $\mu$ M                 |                                  | 305.38 $\mu$ M                 |           |

|     |              |       |                    |                                   |                     |                    |                      |      |
|-----|--------------|-------|--------------------|-----------------------------------|---------------------|--------------------|----------------------|------|
| 131 | Phainanoid A |       |                    |                                   | 184.9 $\mu\text{M}$ |                    | 122.28 $\mu\text{M}$ |      |
| 132 | Phainanoid B |       |                    |                                   | 192.8 $\mu\text{M}$ |                    | 249.49 $\mu\text{M}$ |      |
| 133 | Phainanoid C | Plant | <i>Phylanthus</i>  | ConA-induced T-cell proliferation | 6.24 $\mu\text{M}$  | LPS-induced B-cell | 2.35 $\mu\text{M}$   | [56] |
| 134 | Phainanoid D |       | <i>hainanensis</i> |                                   | 8.28 $\mu\text{M}$  | proliferation      | 17.04 $\mu\text{M}$  |      |
| 135 | Phainanoid E |       |                    |                                   | 43.26 $\mu\text{M}$ |                    | 4.38 $\mu\text{M}$   |      |
| 136 | Phainanoid F |       |                    |                                   | 2.04 $\mu\text{M}$  |                    | < 1.60 $\mu\text{M}$ |      |

**Table S4.** Compounds 137–149 with Immunosuppressive Effects.

| Noumber | Compounds                          | Type  | Source                                     | Model 1                                                 | Activities<br>IC <sub>50</sub> | Model 2                                                 | Activities<br>IC <sub>50</sub> | Reference |
|---------|------------------------------------|-------|--------------------------------------------|---------------------------------------------------------|--------------------------------|---------------------------------------------------------|--------------------------------|-----------|
| 137     | Peniandranoid A                    | Fungi | <i>Penicillium</i> sp                      | ConA-induced T cell<br>proliferation(EC <sub>50</sub> ) | 19 $\mu$ M                     | LPS-induced B-cells<br>proliferation(EC <sub>50</sub> ) | /                              | [56]      |
| 138     | Peniandranoid B                    |       |                                            |                                                         | /                              |                                                         | 50 $\mu$ M                     |           |
| 139     | Peniandranoid C                    |       |                                            |                                                         | 4.3 $\mu$ M                    |                                                         | 11 $\mu$ M                     |           |
| 140     | Peniandranoid D                    |       |                                            |                                                         | 11 $\mu$ M                     |                                                         | 8.8 $\mu$ M                    |           |
| 141     | Peniandranoid E                    |       |                                            |                                                         | 27 $\mu$ M                     |                                                         | 12 $\mu$ M                     |           |
| 142     | Isopenicin C                       |       |                                            |                                                         | 23 $\mu$ M                     |                                                         | 23 $\mu$ M                     |           |
| 143     | Isopenicin A                       |       |                                            |                                                         | 8.5 $\mu$ M                    |                                                         | 8.5 $\mu$ M                    |           |
| 144     | Isopenicin B                       | Plant | <i>Gentianella</i><br><i>turkestanorum</i> | anti-CD3/anti-CD28 stimulated<br>spleen cells           | 23 $\mu$ M                     | IFN- $\gamma$ production                                | 7.5 $\mu$ M                    | [57]      |
| 145     | Nitidasin                          |       |                                            |                                                         | 12.31 $\mu$ M                  |                                                         | 16.5 $\mu$ M                   |           |
| 146     | Gentianelloid F                    |       |                                            |                                                         | 13.68 $\mu$ M                  |                                                         | 14.66 $\mu$ M                  |           |
| 147     | Alborosin                          | Plant | Colquhounia<br>coccinea var.<br>mollis     | induced by anti-CD3/CD4<br>monoclonal antibodies        | 14.31 $\mu$ M                  | /                                                       | 12.4 $\mu$ M                   | [58]      |
| 148     | Colquhounoid D                     |       |                                            |                                                         | 8.38 $\mu$ M                   |                                                         | /                              |           |
| 149     | 14- <i>epi</i> -colquhoun<br>oid D |       |                                            |                                                         | 5.79 $\mu$ M                   |                                                         | /                              |           |

**Table S5.** Compounds 150–176 with Immunosuppressive Effects.

| Noumber | Compounds                        | Type  | Source                       | Model 1                            | Activities<br>IC <sub>50</sub> | Model 2                           | Activities<br>IC <sub>50</sub> | Reference |
|---------|----------------------------------|-------|------------------------------|------------------------------------|--------------------------------|-----------------------------------|--------------------------------|-----------|
| 150     | Wilfordatin E                    | Plant | <i>Tripterygium</i>          | HEK293 cells induced by LPS        | 8.75 $\mu$ M                   | /                                 | /                              | [60]      |
| 151     | Tripfordine A                    |       | <i>wilfordii</i> Hook.       |                                    | 0.74 $\mu$ M                   |                                   | /                              |           |
| 152     | Wilforine                        |       | f.                           |                                    | 15.66 $\mu$ M                  |                                   | /                              |           |
| 153     | Alopecine A                      | Plant | <i>Sophora alopecuroides</i> | ConA-induced T cell proliferation  | >100 $\mu$ M                   | LPS-induced B-cells proliferation | 69.6 $\mu$ M                   | [61]      |
| 154     | Alopecine B                      |       |                              |                                    | >100 $\mu$ M                   |                                   | 96.8 $\mu$ M                   |           |
| 155     | Alopecine C                      |       |                              |                                    | >100 $\mu$ M                   |                                   | 59.5 $\mu$ M                   |           |
| 156     | Alopecine D                      |       |                              |                                    | 3.9 $\mu$ M                    |                                   | 3.7 $\mu$ M                    |           |
| 157     | Alopecine E                      |       |                              |                                    | 58.7 $\mu$ M                   |                                   | 9.4 $\mu$ M                    |           |
| 158     | Albifpyrrol B                    | Fungi | <i>Albifmbria viridis</i>    | ConA-induced T-cell proliferation  | /                              | LPS-induced B-cell proliferation  | 16.16 $\mu$ M                  | [62]      |
| 159     | Fumiquinazoline J                | Fungi | <i>Aspergillus</i>           | ConA-induced T-cell proliferation  | 29.38 $\mu$ M                  | LPS-induced B-cell proliferation  | 162.58 $\mu$ M                 | [63]      |
| 160     | Fumigaclavine C                  |       | <i>fumigatus</i> HQD24.      |                                    | 52.13 $\mu$ M                  |                                   | /                              |           |
| 161     | 12-Methoxychanofruticosinic acid | Plant | <i>Kopsia officinalis</i>    | human T cell proliferation (PBMCs) | 27.8 $\mu$ M                   | /                                 | /                              | [64]      |
| 162     | N(4)-methylkopsininate           |       |                              |                                    | 21.6 $\mu$ M                   |                                   |                                |           |
| 163     | Demethoxycarbonylkopsin          |       |                              |                                    | 25.4 $\mu$ M                   |                                   |                                |           |
| 164     | Rhazinilam                       |       |                              |                                    | 1.0 $\mu$ M                    |                                   |                                |           |

|     |                     |       |                                  |                                    |               |                                   |               |      |
|-----|---------------------|-------|----------------------------------|------------------------------------|---------------|-----------------------------------|---------------|------|
| 165 | Gentianelloid A     | Plant | <i>Gentianella turkestanorum</i> | anti-CD3/CD28 mAbs induced         | 5.64 $\mu$ M  | /                                 | /             | [65] |
| 166 | Gentianelloid B     |       |                                  | murine T lymphocytes proliferation | 3.93 $\mu$ M  |                                   |               |      |
| 167 | Eurysoloids A       | Plant | Eurysolen gracilis               | anti-CD3/CD28 mAbs induced         | 17.4 $\mu$ M  | /                                 | /             | [66] |
| 168 | Eurysoloids B       |       |                                  | murine T lymphocytes proliferation | 15.94 $\mu$ M |                                   |               |      |
| 169 | Rhazinilam          | Plant | <i>Pausinystalia yohimbe</i>     | ConA-induced T-cell proliferation  | 16.8 $\mu$ M  | LPS-induced B-cell proliferation  | 13.5 $\mu$ M  | [65] |
| 170 | Ophiorrhine C       | Plant | <i>Ophiorrhiza cantoniensis</i>  | ConA-induced T cell proliferation  | 23.6 $\mu$ M  | LPS-induced B-cell proliferation  | 8.7 $\mu$ M   | [66] |
| 171 | Ophiorrhine D       |       | <i>Hace</i>                      |                                    | 17.9 $\mu$ M  |                                   | 68.5 $\mu$ M  |      |
| 172 | Ophiorrhine E       |       |                                  |                                    | >200 $\mu$ M  |                                   | 116.2 $\mu$ M |      |
| 173 | Ophiorrhine F       | Plant | <i>Ophiorrhiza japonica</i>      | ConA-induced T cell proliferation  | >200 $\mu$ M  | LPS-induced B-cells proliferation | <0.4 $\mu$ M  | [67] |
| 174 | Ophiorrhine G       |       |                                  |                                    | >201 $\mu$ M  |                                   | 47.3 $\mu$ M  |      |
| 175 | Reserpine           | Plant | <i>Rauvolfia yunnanensis</i>     | human T cell                       | 5.0 $\mu$ M   | /                                 | /             | [68] |
| 176 | 11-hydroxyburnamine |       | <i>Tsiang</i>                    |                                    | 5.9 $\mu$ M   |                                   |               |      |

**Table S6.** Compounds 177–234with Immunosuppressive Effects.

| Noumber | Compounds                                                          | Type  | Source                      | Model 1                           | Activities<br>IC <sub>50</sub> | Model 2 | Activities<br>IC <sub>50</sub> | Reference |
|---------|--------------------------------------------------------------------|-------|-----------------------------|-----------------------------------|--------------------------------|---------|--------------------------------|-----------|
| 177     | Hypaluton A                                                        | Plant | <i>Hypericum patulum</i>    | LPS-induced B-cell proliferation  | 6.8 $\mu$ M                    | /       | /                              | [72]      |
| 178     | Eucalyptin A                                                       | Plant | <i>Eucalyptus globulus.</i> | ConA-induced T-cell proliferation | 18.2 $\mu$ M                   | /       | /                              | [73]      |
| 179     | Eucalyptin B                                                       |       |                             |                                   | 19.1 $\mu$ M                   |         | /                              |           |
| 180     | Eucalyptin C                                                       |       |                             |                                   | 11.8 $\mu$ M                   |         | /                              |           |
| 181     | Eucalyptin D                                                       |       |                             |                                   | 10.2 $\mu$ M                   |         | /                              |           |
| 182     | Eucalyptin E                                                       |       |                             |                                   | 35.8 $\mu$ M                   |         | /                              |           |
| 183     | Eucalyptin F                                                       |       |                             |                                   | 26.3 $\mu$ M                   |         | /                              |           |
| 184     | Eucalyptin G                                                       |       |                             |                                   | 35.3 $\mu$ M                   |         | /                              |           |
| 185     | Macrocarpal A                                                      |       |                             |                                   | 20.4 $\mu$ M                   |         | /                              |           |
| 186     | Macrocarpal B                                                      |       |                             |                                   | 31.2 $\mu$ M                   |         | /                              |           |
| 187     | Macrocarpal C                                                      |       |                             |                                   | 69.6 $\mu$ M                   |         | /                              |           |
| 188     | Macrocarpal D                                                      |       |                             |                                   | 41.2 $\mu$ M                   |         | /                              |           |
| 189     | Macrocarpal E                                                      |       |                             |                                   | 42.4 $\mu$ M                   |         | /                              |           |
| 190     | Macrocarpal Q                                                      |       |                             |                                   | 52.3 $\mu$ M                   |         | /                              |           |
| 191     | Eucarobustol E                                                     |       |                             |                                   | 68.4 $\mu$ M                   |         | /                              |           |
| 192     | Euglobal-V                                                         |       |                             |                                   | 69.3 $\mu$ M                   |         | /                              |           |
| 193     | Euglobal-III                                                       |       |                             |                                   | 129.3 $\mu$ M                  |         | /                              |           |
| 194     | 1-(2,6-dihydroxy-4-methoxy-3,5-dimethylphenyl)-2-methylbutan-1-one |       |                             |                                   | 70.2 $\mu$ M                   |         | /                              |           |

|     |                                                                                                     |       |                                    |                                   |               |                                  |              |      |
|-----|-----------------------------------------------------------------------------------------------------|-------|------------------------------------|-----------------------------------|---------------|----------------------------------|--------------|------|
| 195 | 1-(2,4-dihydroxy-6-methoxy-3,5-dimethylphenyl)-3-methylbutan-1-one                                  | Plant | <i>Eucalyptus globulus</i> .       | ConA-induced T-cell proliferation | 132.9 $\mu$ M | /                                | /            | [72] |
| 196 | Prenyllongnol A                                                                                     | Plant | <i>Hypericum longistylum</i>       | ConA-induced T cell proliferation | 3.44 $\mu$ M  | /                                | /            | [74] |
| 197 | Prenyllongnol B                                                                                     |       |                                    |                                   | 2.98 $\mu$ M  |                                  | /            |      |
| 198 | Prenyllongnol C                                                                                     |       |                                    |                                   | 5.31 $\mu$ M  |                                  | /            |      |
| 199 | Prenyllongnol D                                                                                     |       |                                    |                                   | 6.34 $\mu$ M  |                                  | /            |      |
| 200 | Dendrophenene A                                                                                     | Plant | <i>Dendrobium devonianum</i>       | ConA-induced T cell proliferation | 0.17 $\mu$ M  | LPS-induced B cell proliferation | 28.3 $\mu$ M | [75] |
| 201 | Dendrophenene B                                                                                     |       |                                    |                                   | 2.47 $\mu$ M  |                                  | 52.6 $\mu$ M |      |
| 202 | Tyrosol                                                                                             | Plant | <i>H. abyssinica</i>               | PMNs and MNCs                     | /             | /                                | /            | [76] |
| 203 | 3,4-dihydroxy-ethyl ester                                                                           |       |                                    |                                   | /             | /                                | /            |      |
| 204 | Daldiniols A                                                                                        | Plant | <i>Anoectochilus roxburghii</i>    | LPS-induced B-cell proliferation  | 0.06 $\mu$ M  | /                                | /            | [77] |
| 205 | 2-phenylpropanoate-2-O- $\beta$ -D-apiofuranosyl-(1 $\rightarrow$ 6)-O- $\beta$ -D-glucopyranoside  | Plant | <i>Cinnamomum cassia</i>           | ConA-induced murine T cells       | >200 $\mu$ M  | /                                | /            | [72] |
| 206 | 3,4,5-trimethoxyphenol- $\beta$ -D-api ofuranosyl-(1 $\rightarrow$ 6)-O- $\beta$ -D-glucopyranoside |       |                                    |                                   | 12.5 $\mu$ M  |                                  | /            |      |
| 207 | (+)-Hyperzewalsin B                                                                                 | Plant | <i>hypericum przewalskii maxim</i> | LPS-induced B-cell proliferation  | 7.36 $\mu$ M  | /                                | /            | [78] |
| 208 | (-)-hyperzewalsin B                                                                                 |       |                                    |                                   | 7.14 $\mu$ M  |                                  | /            |      |
| 209 | Hyperzewalsin E                                                                                     |       |                                    |                                   | 7.2 $\mu$ M   |                                  | /            |      |
| 210 | Lupulone D                                                                                          |       |                                    |                                   | 6.61 $\mu$ M  |                                  | /            |      |



|     |                                                                                                         |       |                                  |   |   |               |      |
|-----|---------------------------------------------------------------------------------------------------------|-------|----------------------------------|---|---|---------------|------|
| 211 | 8- <i>O</i> -methyl mycophenolic acid                                                                   | Fungi | <i>Penicillium bialowiezense</i> | / | / | 4.21 $\mu$ M  | [79] |
| 212 | 3-hydroxy mycophenolic acid                                                                             |       |                                  |   | / | 1.23 $\mu$ M  |      |
| 213 | 6-(5-carboxy-3-methylpent-2-enyl)-7-hydroxy-3,5-dimethoxy-4-methylphthalan-1-one                        |       |                                  |   | / | 2.76 $\mu$ M  |      |
| 214 | 6-(5-methoxycarbonyl-3-methylpent-2-enyl)-3,7-dihydroxy-5-methoxy-4-methylphthalan-1-one                |       |                                  |   | / | 9.12 $\mu$ M  |      |
| 215 | 6-(3-carboxybutyl)-7-hydroxy-5-methoxy-4-methylphthalan-1-one                                           |       |                                  |   | / | >40 $\mu$ M   |      |
| 216 | 6-[5-(2,3-dihydroxy-1-carboxyglyceride)-3-methylpent-2-enyl]-7-hydroxy-5-methoxy-4-methylphthalan-1-one | Fungi | <i>Penicillium bialowiezense</i> | / | / | 19.65 $\mu$ M |      |
| 217 | 6-[5-(1-carboxy-4-N-carboxylate)-3-methylpent-2-enyl]-7-hydroxy-5-methoxy-4-methylphthalan-1-one        |       |                                  |   | / | 24.58 $\mu$ M |      |
| 218 | N-mycophenoyl-L-valine                                                                                  |       |                                  |   | / | 30.56 $\mu$ M |      |
| 219 | N-mycophenoyl-L-phenylalanine                                                                           |       |                                  |   | / | >40 $\mu$ M   |      |
| 220 | N-mycophenoyl-L-alanine                                                                                 |       |                                  |   | / | >40 $\mu$ M   |      |

|     |                 |       |                                    |                                            |               |   |   |      |
|-----|-----------------|-------|------------------------------------|--------------------------------------------|---------------|---|---|------|
| 221 | Hyperformitin A | Plant | <i>Hypericum perforatum</i>        | LPS-Induced Murine B Cell Proliferation    | 9.7 $\mu$ M   | / | / | [80] |
| 222 | Hyperformitin B |       |                                    |                                            | >10 $\mu$ M   |   | / |      |
| 223 | Hyperformitin C |       |                                    |                                            | 4.3 $\mu$ M   |   | / |      |
| 224 | Hyperformitin D |       |                                    |                                            | 9.3 $\mu$ M   |   | / |      |
| 225 | Hyperformitin E |       |                                    |                                            | 4.1 $\mu$ M   |   | / |      |
| 226 | Hyperformitin G |       |                                    |                                            | 9.2 $\mu$ M   |   | / |      |
| 227 | Hyperformitin H |       |                                    |                                            | >10 $\mu$ M   |   | / |      |
| 228 | Hyperformitin J |       |                                    |                                            | >10 $\mu$ M   |   | / |      |
| 229 | Hyperformitin K |       |                                    |                                            | 8.8 $\mu$ M   |   | / |      |
| 230 | Hyperformitin L |       |                                    |                                            | >10 $\mu$ M   |   | / |      |
| 231 | Hyperformitin M | Plant | <i>Hypericum przewalskii</i> Maxim | anti-CD3/anti-CD28 stimulated spleen cells | >10 $\mu$ M   | / | / | [81] |
| 232 | Przewalcyrone C |       |                                    |                                            | 5.01 $\mu$ M  |   | / |      |
| 233 | Przewalcyrone D |       |                                    |                                            | 5.26 $\mu$ M  |   | / |      |
| 234 | Cumilcinol E    | Plant | <i>Hypericum wilsonii</i>          | ConA-induced T-cell proliferation          | 4.803 $\mu$ M | / | / | [82] |

**Table S7.** Compounds 235–262 with Immunosuppressive Effects.

| Noumber | Compounds                                                                       | Type  | Source                        | Model 1                                   | Activities<br>IC <sub>50</sub> | Model 2                          | Activities<br>IC <sub>50</sub> | Reference |
|---------|---------------------------------------------------------------------------------|-------|-------------------------------|-------------------------------------------|--------------------------------|----------------------------------|--------------------------------|-----------|
| 235     | Jaceosidin                                                                      | Plant | <i>Artemisia argyi</i>        | LPS stimulated in BV-2 microglial cells   | 1.9 $\mu$ M                    | /                                | /                              | [83]      |
| 236     | Eupatilin                                                                       |       |                               |                                           | 4 $\mu$ M                      | /                                | /                              |           |
| 237     | Tsaokonol A                                                                     |       |                               |                                           | 16.2 $\mu$ M                   |                                  | /                              |           |
| 238     | Tsaokonol B                                                                     | Plant | <i>Amomum tsao-ko</i>         | against LPS-induced RAW 264.7 macrophages | 14 $\mu$ M                     | /                                | /                              | [28]      |
| 239     | Tsaokonol C                                                                     |       |                               |                                           | 10.6 $\mu$ M                   |                                  | /                              |           |
| 240     | Tsaokonol D                                                                     |       |                               |                                           | 13.5 $\mu$ M                   |                                  | /                              |           |
| 241     | Tsaokonol E                                                                     |       |                               |                                           | 41.5 $\mu$ M                   |                                  | /                              |           |
| 242     | Tsaokonol F                                                                     |       |                               |                                           | 39.2 $\mu$ M                   |                                  | /                              |           |
| 243     | Tsaokonol G                                                                     |       |                               |                                           | 26.1 $\mu$ M                   |                                  | /                              |           |
| 244     | Tsaokonol H                                                                     |       |                               |                                           | 28.7 $\mu$ M                   |                                  | /                              |           |
| 245     | Tsaokonol I                                                                     |       |                               |                                           | 30.6 $\mu$ M                   |                                  | /                              |           |
| 246     | Tsaokonol J                                                                     |       |                               |                                           | 13.5 $\mu$ M                   |                                  | /                              |           |
| 247     | 4',5'-dihydroxy-5,7-dimethoxy-6-(3-methylbut-2-enyl)-coumaronochromone          | Plant | <i>Campylotropis hirtella</i> | ConA-induced T-cell proliferation         | 0.28 $\mu$ M                   | LPS-induced B-cell proliferation | 1.55 $\mu$ M                   | [84]      |
| 248     | 6,3'-di(3-hydroxy-3-methylbutyl)-5,7,2'-4'-tetrahydroxyisoflavanone             |       |                               |                                           | 79.13 $\mu$ M                  |                                  | 29.12 $\mu$ M                  |           |
| 249     | 3(R)-6,3'-di(3-hydroxy-3-methylbutyl)-2'-methoxyl-5,7,4'-trihydroxyisoflavanone |       |                               |                                           | 18.12 $\mu$ M                  |                                  | 6.66 $\mu$ M                   |           |
| 250     | Hydroisoflavone C                                                               |       |                               |                                           | 53.16 $\mu$ M                  |                                  | 25.76 $\mu$ M                  |           |

|     |                                                                                                                                                            |       |                               |                                   |               |                                  |              |      |
|-----|------------------------------------------------------------------------------------------------------------------------------------------------------------|-------|-------------------------------|-----------------------------------|---------------|----------------------------------|--------------|------|
| 251 | 3-(1',4'-dihydroxycyclohexyl)-6-geranyl-5,7,-dihydroxyisoflavone                                                                                           | Plant | <i>Campylotropis hirtella</i> | ConA-induced T-cell proliferation | 3.25 $\mu$ M  |                                  | 2.68 $\mu$ M | [84] |
| 252 | 5,7,4'-trihydroxy-3'-[6,7-dihydroxy-3,7-dimethyl-2( <i>E</i> )-octenyl] isoflavone                                                                         |       |                               |                                   | 4.52 $\mu$ M  | LPS-induced B-cell proliferation | 2.38 $\mu$ M |      |
| 253 | 2R,3R-3'-[7-hydroxy-3,7-dimethyl-2( <i>E</i> )-octenyl]-2,3-trans-5,7,4'-trihydroxy-flavonol                                                               |       |                               |                                   | 4.34 $\mu$ M  |                                  | 4.82 $\mu$ M |      |
| 254 | 3''',4',4''',7-tetrahydroxy-3''',5-dimethoxy-3- <i>O</i> - $\beta$ -D-glucopyranosyl-8-isopentenol-8'''-prenyl-(3'→7'')-biflavonoid                        | Plant | <i>Citrus medica L. var.</i>  | ConA-induced T-cell proliferation | 16.83 $\mu$ M |                                  | /            | [85] |
| 255 | 3''',4''',4''',5-dihydroxy-5-methoxy-3- <i>O</i> - $\beta$ -D-glucopyranosyl-7,8-(12,13-dimethylchromene)-9'''-isopropyl-(3'→7'')-biflavonoid              |       |                               |                                   | 18.95 $\mu$ M | /                                | /            |      |
| 256 | 3''',4''',4''',5-dihydroxy-3''',5,5''',5'''-trimethoxy-3- <i>O</i> - $\beta$ -D-glucopyranosyl-7,8-isopropylpenentenone-9'''-carbonyl-(3'→7'')-biflavonoid |       |                               |                                   | 20.28 $\mu$ M | /                                | /            |      |
| 257 | Amentoflavone<br>7''- <i>O</i> - $\beta$ -D-glucopyranoside                                                                                                |       |                               |                                   | 50.90 $\mu$ M |                                  | /            |      |

|     |                                                                                                                                                                |       |                                |                                   |               |   |
|-----|----------------------------------------------------------------------------------------------------------------------------------------------------------------|-------|--------------------------------|-----------------------------------|---------------|---|
| 258 | 2-(4'-hydroxy-3'-methoxyphenyl)-3-hydroxy-12,13-dimethylchromene-3'',4'',5''-12-9-trimethoxyphenyl-8''-(4''',5'''-dimethylallyl)-dipyrano-xanthene-4,9''-dione |       |                                | 41.82 $\mu$ M                     | /             |   |
| 259 | 2-(4'-hydroxy-3'-methoxyphenyl)-3-hydroxy-7,8-furan-10-isopropanol-1'',5''-144 isopropylpentenone-pyranochromene-2'',4,6''-trione                              | Plant | <i>Hippophae rhamnoides</i> L. | ConA-induced T-cell proliferation | 19.42 $\mu$ M | / |
| 260 | 2-(4'-hydroxy-3',5'-dimethoxyphenyl)-3-hydroxy-12,13-dimethylchromene-149 1'',5''-isopropylpentenone-pyranochromene-2'',4,6''-trione                           |       |                                | 20.19 $\mu$ M                     | /             |   |
| 261 | Cinchonain A                                                                                                                                                   |       |                                | 48.05 $\mu$ M                     | /             |   |
| 262 | Cinchonain B                                                                                                                                                   |       |                                | 46.91 $\mu$ M                     | /             |   |

[86]

**Table S8.** Compounds 263–270 with Immunosuppressive Effects.

| Number | Compounds      | Type  | Source                           | Model 1                           | Activities<br>IC <sub>50</sub> | Model 2                          | Activities<br>IC <sub>50</sub> | Reference |
|--------|----------------|-------|----------------------------------|-----------------------------------|--------------------------------|----------------------------------|--------------------------------|-----------|
| 263    | Quadristerol B | Fungi | <i>Aspergillus quadrilineata</i> | ConA-induced T-cell proliferation | 7.43 $\mu$ M                   | LPS-induced B-cell proliferation | /                              | [87]      |
| 264    | Quadristerol C |       |                                  |                                   | 3.95 $\mu$ M                   |                                  | /                              |           |
| 265    | Quadristerol D |       |                                  |                                   | /                              |                                  | 10.96 $\mu$ M                  |           |
| 266    | Quadristerol E |       |                                  |                                   | /                              |                                  | 7.47 $\mu$ M                   |           |
| 267    | Atracynoside A | Plant | <i>Cynanchum atratum</i>         | ConA-induced T-cell proliferation | 3.3 $\mu$ M                    | /                                | /                              | [88]      |
| 268    | Atracynoside B |       |                                  |                                   | 7 $\mu$ M                      |                                  | /                              |           |
| 269    | Atracynoside C |       |                                  |                                   | 6.7 $\mu$ M                    |                                  | /                              |           |
| 270    | Atracynoside E |       |                                  |                                   | 59.3 $\mu$ M                   |                                  | /                              |           |

**Table S9.** Compounds 271–324 with Immunosuppressive Effects.

| Noumber | Compounds                                                         | Type  | Source                          | Model 1                           | Activities<br>IC <sub>50</sub> | Model 2                           | Activities<br>IC <sub>50</sub> | Reference |
|---------|-------------------------------------------------------------------|-------|---------------------------------|-----------------------------------|--------------------------------|-----------------------------------|--------------------------------|-----------|
| 271     | (+)-Adprepyrone B                                                 | Fungi | <i>Talaromyces adpressu</i>     | ConA-induced T-cell proliferation | 11.6 $\mu$ M                   | /                                 | /                              | [89]      |
| 272     | (+)-Adprepyrone D                                                 |       |                                 |                                   | 8.9 $\mu$ M                    |                                   | /                              |           |
| 273     | (–)-Adprepyrone D                                                 |       |                                 |                                   | 9.6 $\mu$ M                    |                                   | /                              |           |
| 274     | (+)-Adprepyrone E                                                 |       |                                 |                                   | 16.8 $\mu$ M                   |                                   | /                              |           |
| 275     | (–)-Adprepyrone E                                                 |       |                                 |                                   | 16.8 $\mu$ M                   |                                   | /                              |           |
| 276     | 6-[( <i>E</i> )-3-Hydroxyprop-1-enyl]-4-methoxy-5-methyl-2-pyrone | Plant | <i>Epigynum cochinchinensis</i> | ConA-induced T-cell proliferation | 19.8 $\mu$ M                   | /                                 | /                              | [90]      |
| 277     | Pinoresinol                                                       |       |                                 |                                   | 12.5 $\mu$ M                   |                                   | /                              |           |
| 278     | Syringaresinol                                                    |       |                                 |                                   | 50 $\mu$ M                     |                                   | /                              |           |
| 279     | Sydoxanthone B                                                    | Fungi | <i>Aspergillus sydowii</i>      | ConA-induced T-cell proliferation | 22.53 $\mu$ M                  | LPS-induced B-cells proliferation | 15.3 $\mu$ M                   | [91]      |
| 280     | 13- <i>O</i> -acetylsydowinin B                                   |       |                                 |                                   | 172.7 $\mu$ M                  |                                   | /                              |           |
| 281     | Diaporchromone A                                                  | Plant | <i>Rhizophora mangle</i>        | ConA-induced T-cell proliferation | 34 $\mu$ M                     | LPS-induced B-cells proliferation | 117 $\mu$ M                    | [92]      |
| 282     | Peniphenone                                                       | Fungi | <i>Penicillium sp.</i> ZJ-SY2   | ConA-induced T-cell proliferation | 8.1 $\mu$ M                    | LPS-induced B-cells proliferation | 9.3 $\mu$ M                    | [93]      |

|     |                                                               |       |                                          |                                                             |               |                                     |              |      |
|-----|---------------------------------------------------------------|-------|------------------------------------------|-------------------------------------------------------------|---------------|-------------------------------------|--------------|------|
| 283 | Methyl peniphenone                                            | Fungi | <i>Penicillium sp.</i><br>ZJ-SY2         | ConA-induced T-cell<br>proliferation                        | 17.5 $\mu$ M  | B-cells proliferation               | 23.7 $\mu$ M | [93] |
| 284 | Conioxanthone A                                               |       |                                          |                                                             | 8.2 $\mu$ M   |                                     | 7.5 $\mu$ M  |      |
| 285 | Methyl-8-hydroxy-6-methyl-9-oxo-9H-xanthene<br>-1-carboxylate |       |                                          |                                                             | 25.7 $\mu$ M  |                                     | 26.4 $\mu$ M |      |
| 286 | Pinselin                                                      |       |                                          |                                                             | 5.9 $\mu$ M   |                                     | 7.5 $\mu$ M  |      |
| 287 | Sydowinin B                                                   |       |                                          |                                                             | 19.2 $\mu$ M  |                                     | 20.8 $\mu$ M |      |
| 288 | Sydowinin A                                                   |       |                                          |                                                             | 6.5 $\mu$ M   |                                     | 7.1 $\mu$ M  |      |
| 289 | Remisporine B                                                 |       |                                          |                                                             | 30.1 $\mu$ M  |                                     | 32.4 $\mu$ M |      |
| 290 | Epiremisorpine B                                              |       |                                          |                                                             | 30.8 $\mu$ M  |                                     | 31.2 $\mu$ M |      |
| 291 | Pestaphilone A                                                | Fungi | <i>Pestalotiopsis</i><br><i>oxyanthi</i> | murine T lymphocyte<br>proliferation stimulated<br>by Con A | 9.36 $\mu$ M  | /                                   | /            | [94] |
| 292 | Pestaphilone B                                                |       |                                          |                                                             | 21.78 $\mu$ M |                                     | /            |      |
| 293 | Pestaphilone C                                                |       |                                          |                                                             | 17.94 $\mu$ M |                                     | /            |      |
| 294 | Pestaphilone D                                                |       |                                          |                                                             | 19.72 $\mu$ M |                                     | /            |      |
| 295 | Pestaphilone E                                                |       |                                          |                                                             | 25.64 $\mu$ M |                                     | /            |      |
| 296 | Pestaphilone F                                                |       |                                          |                                                             | 35.21 $\mu$ M |                                     | /            |      |
| 297 | Podospin A                                                    | Fungi | <i>Podospira sp</i>                      | ConA-induced T cell<br>proliferation                        | 10.6 $\mu$ M  | LPS-induced B cell<br>proliferation | 10.3 $\mu$ M | [95] |
| 298 | Podospin E                                                    |       |                                          |                                                             | 25.1 $\mu$ M  |                                     | 27.7 $\mu$ M |      |
| 299 | Podospin J                                                    |       |                                          |                                                             | 18.8 $\mu$ M  |                                     | 21.9 $\mu$ M |      |
| 300 | Podospin L                                                    |       |                                          |                                                             | 16.5 $\mu$ M  |                                     | 14.6 $\mu$ M |      |
| 301 | LL-Z1640-1                                                    |       |                                          |                                                             | 7.4 $\mu$ M   |                                     | 6.4 $\mu$ M  |      |
| 302 | (5E)-7-oxozeaenol                                             |       |                                          |                                                             | 6.0 $\mu$ M   |                                     | 6.2 $\mu$ M  |      |
| 303 | Cochliomycin D                                                |       |                                          |                                                             | 11.4 $\mu$ M  |                                     | 6.8 $\mu$ M  |      |
| 304 | Cochliomycin E                                                |       |                                          |                                                             | 24.1 $\mu$ M  |                                     | 29.1 $\mu$ M |      |
| 305 | Cochliomycin F                                                |       |                                          |                                                             | 15.2 $\mu$ M  |                                     | 11.8 $\mu$ M |      |



|     |                             |       |                                  |                                            |               |                                  |              |      |
|-----|-----------------------------|-------|----------------------------------|--------------------------------------------|---------------|----------------------------------|--------------|------|
| 306 | Dihydrohypothemycin         | Fungi | <i>Podospora</i> sp              | ConA-induced T cell proliferation          | 8.1 $\mu$ M   |                                  | 8.5 $\mu$ M  | [95] |
| 307 | Aigialomycin D              |       |                                  |                                            | 16.3 $\mu$ M  |                                  | 18.4 $\mu$ M |      |
| 308 | 1-naphthaleneheptanoic acid | Fungi | <i>Tripterygium wilfordii</i> .  | anti-CD3/anti-CD28 stimulated spleen cells | 16.51 $\mu$ M | /                                | /            | [96] |
| 309 | Monacolin K                 |       |                                  |                                            | 8.75 $\mu$ M  |                                  | /            |      |
| 310 | Monacolin L                 |       |                                  |                                            | 5.3 $\mu$ M   |                                  | /            |      |
| 311 | Monacolin J                 |       |                                  |                                            | 6.74 $\mu$ M  |                                  | /            |      |
| 312 | Curtachalasin F             | Fungi | <i>Xylaria cf. curta</i>         | ConA-induced T-cell proliferation          | 70.9 $\mu$ M  |                                  | 2.4 $\mu$ M  | [75] |
| 313 | Curtachalasin H             |       |                                  |                                            | 28.5 $\mu$ M  |                                  | 72.6 $\mu$ M |      |
| 314 | Curtachalasin I             |       |                                  |                                            | 13.3 $\mu$ M  |                                  | 72.6 $\mu$ M |      |
| 315 | Curtachalasin J             |       |                                  |                                            | 21.0 $\mu$ M  |                                  | /            |      |
| 316 | Curtachalasin M             |       |                                  |                                            | 31.1 $\mu$ M  | LPS-induced B-cell proliferation | /            |      |
| 317 | Curtachalasin N             |       |                                  |                                            | 62.5 $\mu$ M  |                                  | /            |      |
| 318 | Curtachalasin O             |       |                                  |                                            | 12.6 $\mu$ M  |                                  | /            |      |
| 319 | Curtachalasin P             |       |                                  |                                            | 16.5 $\mu$ M  |                                  | 72.3 $\mu$ M |      |
| 320 | urtachalasins A             |       |                                  |                                            | 29.0 $\mu$ M  |                                  | /            |      |
| 321 | Curtachalasins B            |       |                                  |                                            | 39.7 $\mu$ M  |                                  | 35.4 $\mu$ M |      |
| 322 | Curtachalasins E            |       |                                  |                                            | 22.4 $\mu$ M  |                                  | 88.0 $\mu$ M |      |
| 323 | Ivorenolide B               | Plant | <i>Khaya ivorensis</i>           | LPS-induced B-cell proliferation           | 7.2 $\mu$ M   | /                                | /            | [97] |
| 324 | Efophylin B                 | Fungi | <i>Streptomyces malaysiensis</i> | ConA-induced T-cell proliferation          | 24.6 $\mu$ M  | /                                | /            | [98] |
